# Supplementary material for: Controllable p-type doping of 2D MoS2via Sodium intercalation for optoelectronics
Source: Royal Society of Chemistry journal article supplement (doi:10.1039/d2tc04317c), 2023-01-01
Supplement: d2tc04317c1.pdf [file d2tc04317c1.pdf]

## Supporting Information

### Controllable p-type doping of 2D MoS<sub>2</sub> via Sodium intercalation for optoelectronics

Salman Ullah,<sup>1\*</sup> Ling Li,<sup>2\*</sup> Yixiu Wang,<sup>2‡</sup> Xiaoyu Yang<sup>1</sup>, Mingwei Tang,<sup>2</sup> Yuan Xiang,<sup>3</sup> and Qing Yang<sup>2‡</sup>

<sup>1</sup>State Key Laboratory of Modern Optical Instrumentation, International Research Center for Advanced Photonics, College of Optical Science and Engineering, Zhejiang University, Hangzhou 310027, China

<sup>2</sup>Research Center for Humanoid Sensing, Zhejiang Lab, Hangzhou 311100, China

<sup>3</sup>Department of Mathematical & Physical Sciencies, Chengdu University of Technology, Chengdu 610059, China

\*e-mail: Correspondence and requests for materials should be addressed to Y. X. W (yixiuwang@zhejianglab.com) or Q. Y (qingyang@zju.edu.cn)

\*These authors contributed equally to this work.

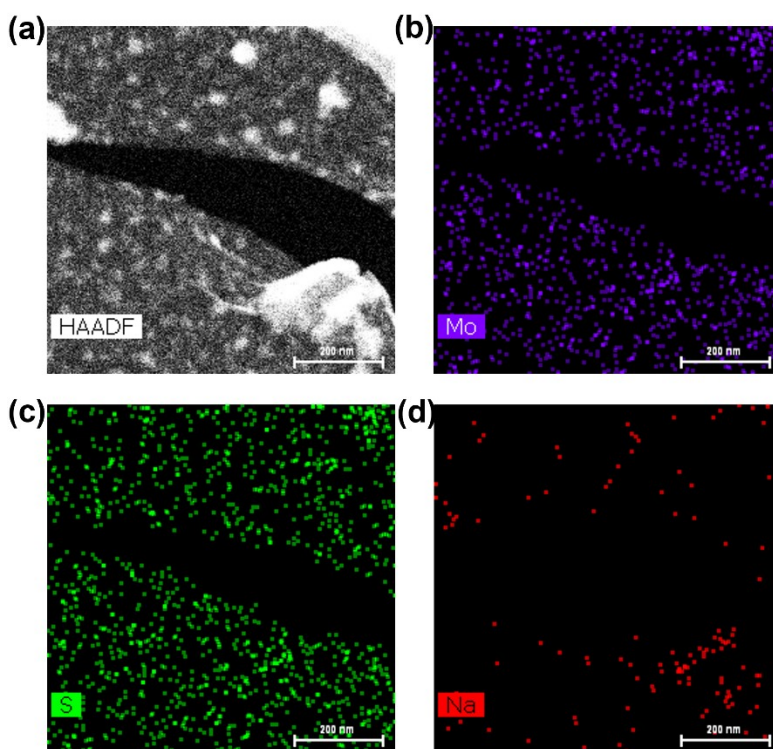

**Figure S1.** STEM EDS mapping of thin MoS<sub>2</sub> with NaOH grown on SiO<sub>2</sub>/Si (a) High-angle-annular-dark-field (HAADF) image of the MoS<sub>2</sub> with NaOH on SiO<sub>2</sub>/Si substrate. (b), (c), and are the elemental maps of MoS<sub>2</sub> on SiO<sub>2</sub>/Si, showing the location of Mo, S, and Na respectively.

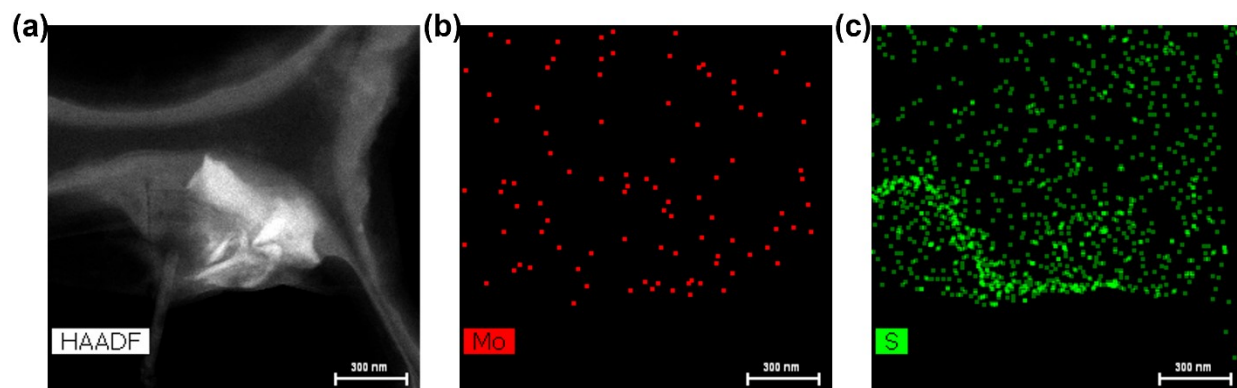

**Figure S2.** STEM EDS mapping of thin MoS<sub>2</sub> without NaOH grown on SiO<sub>2</sub>/Si (a) High-angle-annular-dark-field (HAADF) image of the MoS<sub>2</sub> without NaOH on SiO<sub>2</sub>/Si substrate. (b) and (c) are the elemental maps of MoS<sub>2</sub> on SiO<sub>2</sub>/Si, showing the location of Mo and S respectively.

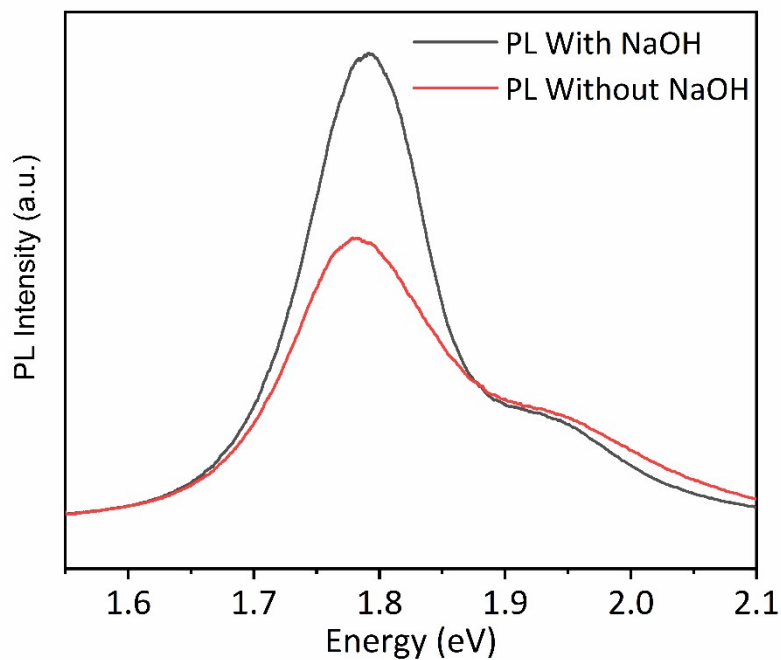

**Figure S3.** PL spectra of MoS<sub>2</sub> with and without NaOH

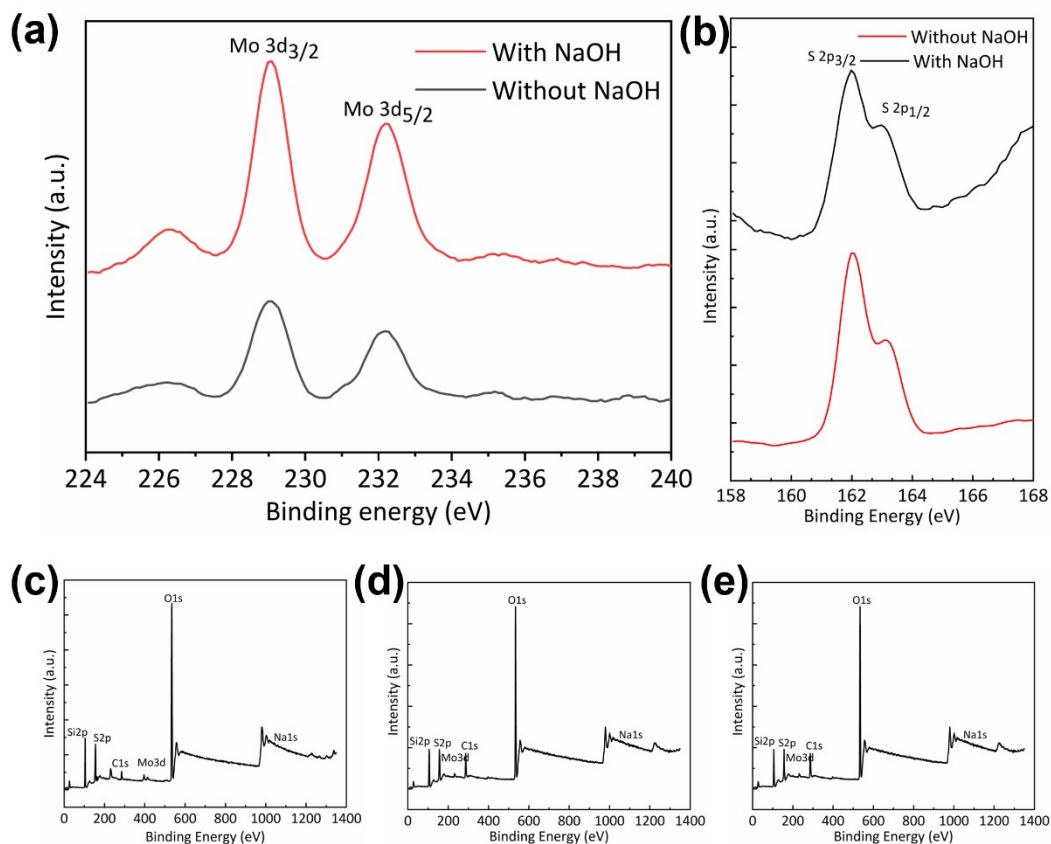

**Figure S4.** XPS spectra of (a) Mo 3d and (b) S 2p of the sample with and without NaOH. Survey spectrum of Na-doped MoS<sub>2</sub> (c) Low doped concentration (d) medium concentration (e) High concentration

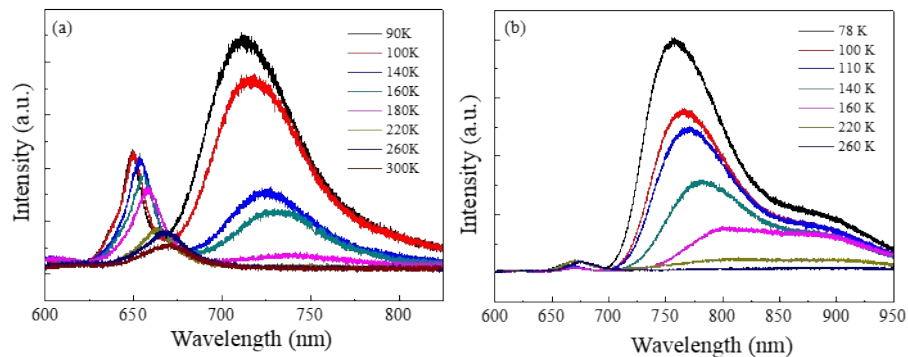

**Figure S5.** PL spectra of MoS<sub>2</sub> with (a) and without (b) NaOH

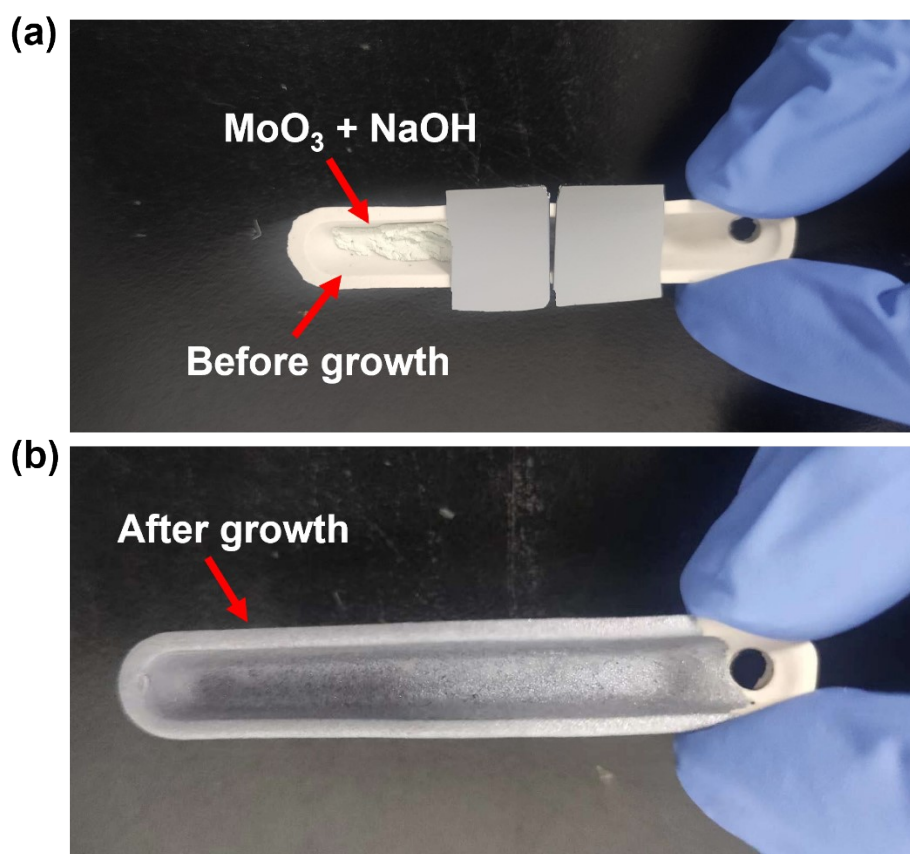

**Figure S6.** Influences of NaOH precursor during CVD synthesis of MoS<sub>2</sub> flakes, sodium clusters were observed on the alumina boat.

A TEM grid is placed on the targeted MoS<sub>2</sub> flakes grown on the SiO<sub>2</sub>/Si substrate is shown in figure S7 (a). As displayed in figure S7 (b) a drop of isopropyl alcohol (IPA) is placed next to the

TEM grid. After the IPA evaporates completely, a drop of potassium hydroxide (KOH) placed next to the TEM grid is shown in figure S7 (c). After etching away, the  $\text{SiO}_2$ , the TEM grid with  $\text{MoS}_2$  flakes is detached from the Si substrate. The TEM grid is then rinsed in de-ionized (DI) water several times is shown in figure S7 (d).

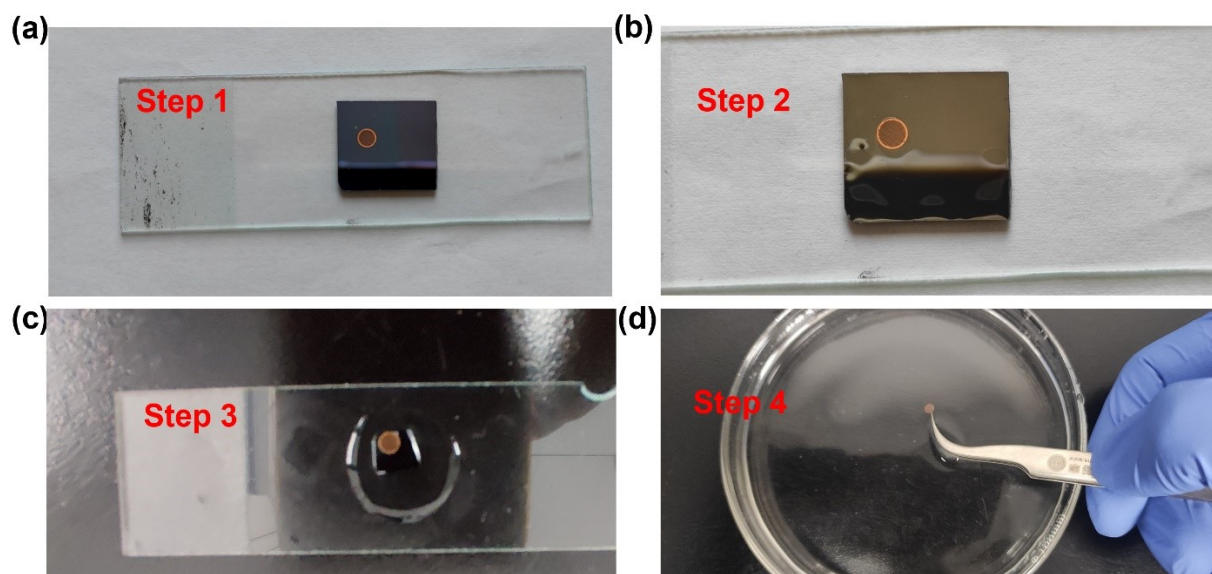

**Figure S7.** Transfer of CVD synthesis  $\text{MoS}_2$  flakes to the TEM grid.

we observed the from the SEM result, when the growth temperature reduce from  $800\text{ }^{\circ}\text{C}$  to  $700\text{ }^{\circ}\text{C}$  the morphology of  $\text{MoS}_2$  flakes changes from equilateral trinagle to three-point star is shown in **Figure S8**. This is possibly due to lowering the temperature the evaporation of  $\text{MoO}_3$  reduces, resulting in a Mo:S ratio lower than the higher growth temperature under  $800\text{ }^{\circ}\text{C}$ , which makes the difference in the growth between Mo-zz terminations and S-zz terminations larger.



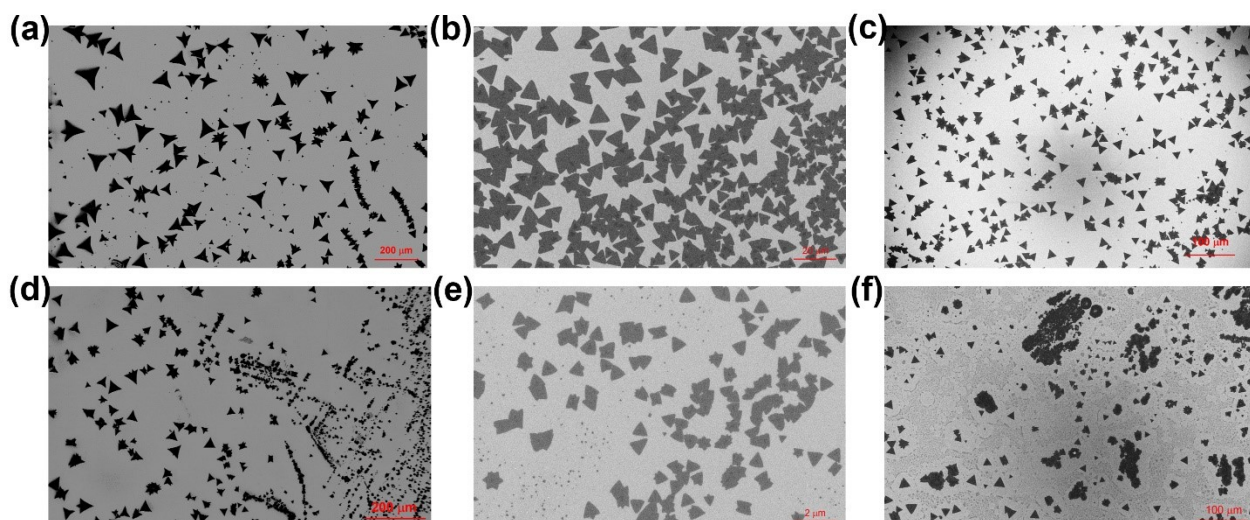

**Figure S8.** Scanning electron microscopy (SEM) images of MoS<sub>2</sub> flakes: With NaOH Chemical vapor deposition (CVD) of MoS<sub>2</sub> grown on SiO<sub>2</sub>/Si at different growth condition is displayed in figure S8. (a-c) i.e., 700 °C, 750 °C and 800 °C respectively. Without NaOH CVD of MoS<sub>2</sub> flakes synthesis on SiO<sub>2</sub>/Si as shown in figure S8. (d-f) at different growth temperature i.e., 700 °C, 750 °C and 800 °C respectively.

We used different amount of NaOH as shown in Table S1. The relative composition NaOH i.e., 8 mg, 12mg, 15 mg, was used with a fixed amount of MoO<sub>3</sub> and Sulfur (S). The details parameter is given below.

| Growth parameter of MoS <sub>2</sub> | NaOH  | MoO <sub>3</sub> | Sulfur | Temperature | Sccm |
|--------------------------------------|-------|------------------|--------|-------------|------|
| Low doping                           | 8 mg  | 50 mg            | 500 mg | 700-800 °C  | 20   |
| Moderate doping                      | 10 mg | 50 mg            | 500 mg | 700-800 °C  | 20   |
| High doping                          | 15 mg | 50 mg            | 500 mg | 700-800 °C  | 30   |

**Table S1**
